# Supplementary material
Source: PubMed Central journal article supplement (PMC5008031)
Supplement: NIHMS774177-supplement-supplement_1.pdf [file NIHMS774177-supplement-supplement_1.pdf]

14  
15  
16  
17  
18  
19  
20  
21  
22  
23  
24  
25  
26  
27  
28  
29  
30  
31  
32  
33  
34  
35  
36  
37  
38  
39  
40  
41  
42  
43  
44  
45  
46  
47  
48  
49  
50  
51  
52  
53  
54  
55  
56  
57  
58  
59  
60  
61  
62  
63  
64  
65

**Online Supplementary Table 1:** Sensitivity of Second Fracture Rates to Decisions about length of Period with no Intervening Claims for a Fracture of the Same type (7 days, 30 days, 60 days, 90 days, 120 days, 180 days).

| Length of Clean Period | Fracture Rate within one year per 1000 person years |          |
|------------------------|-----------------------------------------------------|----------|
|                        | Index Fracture Type                                 |          |
|                        | Wrist                                               | Shoulder |
| 30 days                | 8.53                                                | 5.72     |
| 60 days                | 5.23                                                | 5.20     |
| 90 days                | 4.92                                                | 5.02     |
| 120 days               | 4.75                                                | 4.87     |
| 180 days               | 4.49                                                | 4.70     |

**Online Supplementary Table 2:** Predicted Probability of a Second Fracture in One Year based on Fully Interacted Cox Proportional Hazards Model\* (percentage with second fracture with 95% confidence interval)

| Index Fracture Type | Comorbidity | 66-74 years old |               | 75-84 years old |               | 85+ years old  |                |
|---------------------|-------------|-----------------|---------------|-----------------|---------------|----------------|----------------|
|                     |             | Female          | Male          | Female          | Male          | Female         | Male           |
| Hip                 | 0           | 4.7 (4.1-5.4)   | 3.8 (2.7-4.8) | 5.7 (5.2-6.1)   | 4.0 (3.2-4.8) | 6.6 (6.2-7.0)  | 4.4 (3.5-5.3)  |
|                     | 1           | 5.8 (5.0-6.6)   | 4.3 (3.2-5.4) | 6.9 (6.4-7.4)   | 4.7 (3.9-5.5) | 6.7 (6.3-7.2)  | 4.8 (4.0-5.7)  |
|                     | 2           | 7.2 (6.1-8.2)   | 6.2 (4.7-7.8) | 7.9 (7.2-8.5)   | 5.0 (4.1-5.9) | 7.3 (6.7-7.8)  | 5.6 (4.6-6.6)  |
|                     | >=3         | 7.0 (6.3-7.8)   | 6.0 (5.1-6.9) | 7.6 (7.1-8.0)   | 6.0 (5.4-6.6) | 6.8 (6.4-7.2)  | 6.1 (5.5-6.7)  |
| Shoulder            | 0           | 2.8 (2.3-3.3)   | 2.4 (1.3-3.5) | 4.0 (3.5-4.6)   | 4.6 (3.1-6.2) | 7.0 (6.1-7.9)  | 5.1 (3.0-7.2)  |
|                     | 1           | 3.8 (3.0-4.6)   | 2.0 (0.8-3.2) | 5.6 (4.8-6.4)   | 5.9 (4.0-7.7) | 8.0 (6.8-9.1)  | 5.1 (2.7-7.4)  |
|                     | 2           | 4.9 (3.5-6.2)   | 5.6 (2.8-8.4) | 7.4 (6.2-8.7)   | 5.6 (3.3-7.9) | 9.4 (7.7-11.0) | 4.7 (2.0-7.4)  |
|                     | >=3         | 5.0 (4.0-6.0)   | 5.5 (3.6-7.3) | 6.1 (5.2-7.0)   | 4.9 (3.6-6.2) | 7.1 (5.8-8.5)  | 7.7 (5.4-9.9)  |
| Wrist               | 0           | 2.5 (2.2-2.7)   | 2.3 (1.6-2.9) | 4.3 (3.9-4.6)   | 2.7 (1.9-3.6) | 6.6 (6-7.2)    | 5.1 (3.3-6.8)  |
|                     | 1           | 4.2 (3.6-4.8)   | 1.5 (0.7-2.3) | 6.2 (5.6-6.8)   | 4.8 (3.3-6.2) | 8.1 (7.2-8.9)  | 8.4 (5.5-11.2) |
|                     | 2           | 6.6 (5.4-7.8)   | 3.1 (1.4-4.7) | 5.7 (4.9-6.6)   | 3.9 (2.1-5.6) | 8.9 (7.6-10.1) | 7.9 (4.4-11.3) |
|                     | >=3         | 5.4 (4.5-6.2)   | 4.3 (3.0-5.6) | 6.5 (5.7-7.2)   | 6.4 (5.0-7.7) | 7.0 (6.0-7.9)  | 7.5 (5.5-9.5)  |

\*Model includes type of index fracture, age, gender, race, and comorbidity with the four-way interaction between type, age, gender, comorbidity

14  
15  
16  
17  
18  
19  
20  
21  
22  
23  
24  
25  
26  
27  
28  
29  
30  
31  
32  
33  
34  
35  
36  
37  
38  
39  
40  
41  
42  
43  
44  
45  
46  
47  
48  
49  
50  
51  
52  
53  
54  
55  
56  
57  
58  
59  
60  
61  
62  
63  
64  
65

**Online Supplementary Table 3: Cox Proportional Hazard Model for Time to Second Fracture after an Incident Hip, Humerus, or Wrist Fracture among FFS Medicare beneficiaries over the age of 66 in 2009**

|                                  | Parameter                | Estimate | StdErr | ChiSq  | p-value |
|----------------------------------|--------------------------|----------|--------|--------|---------|
| type of index fx (reference=hip) | Wrist                    | -0.519   | 0.204  | 6.510  | 0.011   |
|                                  | Humerus                  | -0.461   | 0.273  | 2.840  | 0.092   |
| age (reference=66-74)            | age 75-84                | 0.060    | 0.174  | 0.121  | 0.728   |
|                                  | age 85+                  | 0.169    | 0.175  | 0.942  | 0.332   |
| sex (reference=female)           | Male                     | 0.233    | 0.156  | 2.219  | 0.136   |
| race (reference=white)           | black                    | -0.315   | 0.056  | 31.497 | <.0001  |
|                                  | asian                    | -0.217   | 0.083  | 6.862  | 0.009   |
|                                  | hispanic                 | -0.155   | 0.048  | 10.478 | 0.001   |
|                                  | other                    | -0.050   | 0.092  | 0.289  | 0.591   |
| Charlson score (reference=0)     | Charlson Score=1         | 0.145    | 0.191  | 0.574  | 0.449   |
|                                  | Charlson Score=2         | 0.518    | 0.190  | 7.429  | 0.006   |
|                                  | Charlson Score=3         | 0.486    | 0.159  | 9.325  | 0.002   |
|                                  | Wrist*age 75-84          | 0.140    | 0.278  | 0.253  | 0.615   |
|                                  | Wrist*age 85+            | 0.660    | 0.293  | 5.058  | 0.025   |
|                                  | Humerus*age 75-84        | 0.617    | 0.339  | 3.303  | 0.069   |
|                                  | Humerus*age 85+          | 0.614    | 0.363  | 2.865  | 0.091   |
|                                  | Wrist*Male               | -0.141   | 0.224  | 0.396  | 0.529   |
|                                  | Humerus*Male             | -0.068   | 0.299  | 0.052  | 0.819   |
|                                  | Male*age 75-84           | 0.132    | 0.192  | 0.472  | 0.492   |
|                                  | Male*age 85+             | 0.175    | 0.192  | 0.834  | 0.361   |
|                                  | Wrist*Male*age 75-84     | 0.232    | 0.299  | 0.601  | 0.438   |
|                                  | Wrist*Male*age 85+       | -0.003   | 0.313  | 0.000  | 0.992   |
|                                  | Humerus*Male*age 75-84   | -0.443   | 0.369  | 1.443  | 0.230   |
|                                  | Humerus*Male*age 85+     | -0.027   | 0.389  | 0.005  | 0.944   |
|                                  | Wrist*Charlson Score=1   | -0.568   | 0.368  | 2.382  | 0.123   |
|                                  | Wrist*Charlson Score=2   | -0.198   | 0.368  | 0.290  | 0.590   |
|                                  | Wrist*Charlson Score=3   | 0.170    | 0.267  | 0.406  | 0.524   |
|                                  | Humerus*Charlson Score=1 | -0.322   | 0.438  | 0.539  | 0.463   |

14  
15  
16  
17  
18  
19  
20  
21  
22  
23  
24  
25  
26  
27  
28  
29  
30  
31  
32  
33  
34  
35  
36  
37  
38  
39  
40  
41  
42  
43  
44  
45  
46  
47  
48  
49  
50  
51  
52  
53  
54  
55  
56  
57  
58  
59  
60  
61  
62  
63  
64  
65

|                                    |        |       |       |       |
|------------------------------------|--------|-------|-------|-------|
| Humerus*Charlson Score=2           | 0.358  | 0.398 | 0.808 | 0.369 |
| Humerus*Charlson Score=3           | 0.357  | 0.333 | 1.148 | 0.284 |
| age 75-84*Charlson Score=1         | 0.028  | 0.235 | 0.015 | 0.904 |
| age 75-84*Charlson Score=2         | -0.281 | 0.235 | 1.424 | 0.233 |
| age 75-84*Charlson Score=3         | -0.065 | 0.196 | 0.111 | 0.739 |
| age 85+*Charlson Score=1           | -0.057 | 0.237 | 0.058 | 0.809 |
| age 85+*Charlson Score=2           | -0.277 | 0.236 | 1.380 | 0.240 |
| age 85+*Charlson Score=3           | -0.151 | 0.198 | 0.581 | 0.446 |
| Wrist*age 75-84*Charlson Score=1   | 0.963  | 0.452 | 4.536 | 0.033 |
| Wrist*age 75-84*Charlson Score=2   | 0.306  | 0.485 | 0.400 | 0.527 |
| Wrist*age 75-84*Charlson Score=3   | 0.268  | 0.349 | 0.592 | 0.442 |
| Wrist*age 85+*Charlson Score=1     | 1.003  | 0.470 | 4.557 | 0.033 |
| Wrist*age 85+*Charlson Score=2     | 0.416  | 0.491 | 0.720 | 0.396 |
| Wrist*age 85+*Charlson Score=3     | -0.104 | 0.373 | 0.078 | 0.780 |
| Humerus*age 75-84*Charlson Score=1 | 0.392  | 0.518 | 0.572 | 0.450 |
| Humerus*age 75-84*Charlson Score=2 | -0.398 | 0.502 | 0.627 | 0.429 |
| Humerus*age 75-84*Charlson Score=3 | -0.715 | 0.417 | 2.948 | 0.086 |
| Humerus*age 85+*Charlson Score=1   | 0.224  | 0.562 | 0.159 | 0.690 |
| Humerus*age 85+*Charlson Score=2   | -0.690 | 0.560 | 1.517 | 0.218 |
| Humerus*age 85+*Charlson Score=3   | -0.278 | 0.442 | 0.397 | 0.529 |
| Male*Charlson Score=1              | 0.068  | 0.216 | 0.099 | 0.753 |
| Male*Charlson Score=2              | -0.089 | 0.219 | 0.165 | 0.685 |
| Male*Charlson Score=3              | -0.073 | 0.184 | 0.159 | 0.690 |
| Wrist*Male*Charlson Score=1        | 0.893  | 0.394 | 5.138 | 0.023 |
| Wrist*Male*Charlson Score=2        | 0.775  | 0.400 | 3.755 | 0.053 |
| Wrist*Male*Charlson Score=3        | 0.210  | 0.299 | 0.491 | 0.484 |
| Humerus*Male*Charlson Score=1      | 0.416  | 0.473 | 0.773 | 0.379 |
| Humerus*Male*Charlson Score=2      | -0.222 | 0.447 | 0.247 | 0.619 |
| Humerus*Male*Charlson Score=3      | -0.183 | 0.375 | 0.238 | 0.626 |
| Male*age 75-84*Charlson Score=1    | -0.047 | 0.262 | 0.032 | 0.858 |
| Male*age 75-84*Charlson Score=2    | 0.185  | 0.266 | 0.487 | 0.486 |
| Male*age 75-84*Charlson Score=3    | -0.052 | 0.223 | 0.054 | 0.817 |
| Male*age 85+*Charlson Score=1      | -0.135 | 0.262 | 0.266 | 0.606 |

14  
15  
16  
17  
18  
19  
20  
21  
22  
23  
24  
25  
26  
27  
28  
29  
30  
31  
32  
33  
34  
35  
36  
37  
38  
39  
40  
41  
42  
43  
44  
45  
46  
47  
48  
49  
50  
51  
52  
53  
54  
55  
56  
57  
58  
59  
60  
61  
62  
63  
64  
65

|                                         |        |       |       |       |
|-----------------------------------------|--------|-------|-------|-------|
| Male*age 85+*Charlson Score=2           | -0.051 | 0.265 | 0.037 | 0.848 |
| Male*age 85+*Charlson Score=3           | -0.229 | 0.224 | 1.050 | 0.306 |
| Wrist*Male*age 75-84*Charlson Score=1   | -1.098 | 0.481 | 5.205 | 0.023 |
| Wrist*Male*age 75-84*Charlson Score=2   | -0.925 | 0.521 | 3.153 | 0.076 |
| Wrist*Male*age 75-84*Charlson Score=3   | -0.526 | 0.385 | 1.869 | 0.172 |
| Wrist*Male*age 85+*Charlson Score=1     | -1.135 | 0.498 | 5.190 | 0.023 |
| Wrist*Male*age 85+*Charlson Score=2     | -0.779 | 0.525 | 2.199 | 0.138 |
| Wrist*Male*age 85+*Charlson Score=3     | -0.250 | 0.409 | 0.372 | 0.542 |
| Humerus*Male*age 75-84*Charlson Score=1 | -0.345 | 0.561 | 0.379 | 0.538 |
| Humerus*Male*age 75-84*Charlson Score=2 | 0.561  | 0.557 | 1.015 | 0.314 |
| Humerus*Male*age 75-84*Charlson Score=3 | 0.677  | 0.466 | 2.113 | 0.146 |
| Humerus*Male*age 85+*Charlson Score=1   | -0.198 | 0.600 | 0.109 | 0.742 |
| Humerus*Male*age 85+*Charlson Score=2   | 0.762  | 0.610 | 1.560 | 0.212 |
| Humerus*Male*age 85+*Charlson Score=3   | 0.097  | 0.492 | 0.039 | 0.843 |

## Online Supplementary Methodological Appendix

1. Overview
2. Identifying Index Fracture
  - a. Treated as Inpatient
    - i. Inclusion
  - b. Treated as Outpatient
    - i. Inclusion
    - ii. Exclusion
  - c. When multiple fractures on same day
  - d. Exclusions
3. Identifying Second Fracture
  - a. Hip
  - b. Wrist or Humerus
  - c. Other Extremity Fracture

### **Overview**

**Identifying Index Fracture** The general approach to identifying an index fracture was to require a claim with an appropriate diagnosis and treatment without a similar fracture in the prior year. We also applied additional rules when necessary to assure that the event indicated a new fracture rather than follow up care.

### ***Inclusion***

#### **Treated as an Inpatient**

Hip fractures were identified by an acute care hospitalization with an appropriate ICD-9 diagnostic code (Table 1) and a DRG or ICD-9 procedure code indicating surgical repair (Table 2). Humerus and wrist fracture can be treated as inpatient or outpatient and are less likely to be treated with surgery making differentiation of new fracture from follow up care more challenging to distinguish. For inpatient treatment, we required both diagnosis and indication of treatment as with hip. Wrist and humerus ICD-9 diagnostic, DRG and ICD-9 procedure codes are shown in Tables 1 and 2.

| <b>Table 1: ICD-9 Diagnostic Codes</b> |                 |       |
|----------------------------------------|-----------------|-------|
|                                        | <b>ICD-9 DX</b> |       |
| <b>HIP</b>                             | 820.00-820.90   | neck  |
|                                        | 821.00-821.11   | shaft |
| <b>WRIST</b>                           | 813.40-813.54   |       |
| <b>HUMERUS</b>                         | 812.00-812.19   |       |

| <b>Table 2: DRG and Procedure Codes</b> |            |                                                 |
|-----------------------------------------|------------|-------------------------------------------------|
|                                         | <b>DRG</b> | <b>ICD-9 SX</b>                                 |
| <b>HIP</b>                              | 469-470    | 78.55, 79.10, 79.15, 79.30, 79.35, 81.51, 81.52 |
| <b>WRIST OR HUMERUS</b>                 | 483-484    |                                                 |
| <b>WRIST</b>                            | 513-514    | 79.02, 79.12, 79.32, 79.22, 78.53, 78.13        |
| <b>HUMERUS</b>                          | 507-512    | 79.01, 79.31, 78.52, 78.12                      |

### **Treated as an Outpatient**

For outpatient treatment, there are visits not only for acute management of a fracture but also aftercare such as cast changes and repeat imaging. To avoid including a patient who was merely having aftercare for a previous fracture, we required a claim with the appropriate diagnosis and treatment code (CPT on Part B claims) along with a claim for appropriate imaging within seven days before or after the treatment claim, in addition to having no similar fracture in the prior year. The same diagnostic codes were used for outpatient cases and inpatient cases. Treatment was indicated by presence of particular CPT codes as shown in Table 3. And imaging of the appropriate region with plain x-ray, CT scan, or MRI were accepted shown in Table 4

| <b>Table 3: CPT Treatment Codes</b> |                                                                                                                       |
|-------------------------------------|-----------------------------------------------------------------------------------------------------------------------|
|                                     | <b>CPT code</b>                                                                                                       |
| <b>WRIST</b>                        | 25600, 25605, 25609, 25606, 25607, 25608, 25650, 29075, 29085, 29125                                                  |
| <b>HUMERUS</b>                      | 23600, 23605, 23615, 23616, 23620, 23625, 23630, 23665, 23670, 23675, 24500, 23470, 23472, 29065, 29105, 29125, 23620 |

| <b>Table 4: Identifying Imaging for the Non-Hip Fractures Imaging CPT Codes</b> |                                                            |                            |                                                 |
|---------------------------------------------------------------------------------|------------------------------------------------------------|----------------------------|-------------------------------------------------|
|                                                                                 | <b>Plain</b>                                               | <b>CT</b>                  | <b>MRI</b>                                      |
| <b>HIP</b>                                                                      | N/A                                                        | N/A                        | N/A                                             |
| <b>WRIST</b>                                                                    | 73090, 73092, 73100, 73110, 73115                          | 73200, 73201, 73202, 73206 | 73218, 73219, 73220, 73221, 73222, 73223, 73225 |
| <b>HAND</b>                                                                     | 73120, 73130, 73140                                        |                            |                                                 |
| <b>HUMERUS</b>                                                                  | Shoulder/Clavicle 73000, 73010, 73020, 73030, 73040, 73050 | 73200, 73201, 73202, 73206 | 73218, 73219, 73220, 73221, 73222, 73223, 73225 |
|                                                                                 | Elbow<br>73060, 73070, 73080, 73085                        |                            |                                                 |

## Exclusions

We applied exclusions to remove people who were receiving treatments that suggest the event was not an incident osteoporosis-related fracture, such as treatment that was the result of a cancer diagnosis, multitrauma, or complications of a prior fracture (such as indicators for mal- or non-union, infection, revision, or hardware removal). In the case of fractures due to cancer, we excluded fractures with a diagnostic code indicating “pathologic” (Table 4) and the presence of cancer in the year before or one month after the fracture (to account for cases when the fracture is the initial presentation of the cancer). We included in our list of cancers only those know to be primary to bone or to commonly metastasize to bone (Table 5). We did not exclude all fracture indicated as “pathologic” because some clinicians refer to fractures due to any bone disease, including osteoporosis, as pathologic. The codes for identifying multi-trauma and complications treated in the inpatient setting are shown in Table 6 and in the outpatient setting in Table 7.

| <b>Table 4: Codes for “Pathologic” Fractures</b> |                 |
|--------------------------------------------------|-----------------|
|                                                  | <b>ICD-9 DX</b> |
| <b>HIP</b>                                       | 733.14, 733.15  |
| <b>WRIST</b>                                     | 733.12          |
| <b>HUMERUS</b>                                   | 733.11          |
|                                                  | <b>DRG</b>      |
| <b>Any Fracture (Hip, Humerus or Wrist)</b>      | 542, 543, 544   |

| <b>Table 5: Codes for Non-Osteoporosis Related Fractures</b> |                 |
|--------------------------------------------------------------|-----------------|
|                                                              | <b>ICD-9 Dx</b> |
| Breast Cancer                                                | 174.0-174.9     |
| Lung Cancer                                                  | 162.2-162.9     |
| Thyroid Cancer                                               | 193             |
| Renal Cell                                                   | 189.0-189.1     |
| Prostate Cancer                                              | 185             |
| Colon Cancer                                                 | 153.0-153.9     |
| Multiple Myeloma                                             | 203.0           |
| Myeloma (solitary)                                           | 238.6           |
| Chondrosarcoma                                               | 170.9           |
| Osteosarcoma                                                 | 170.7           |
| Paget’s Disease                                              | 731.0           |
| Osteopetrosis                                                | 756.52          |
| Osteomyelitis                                                | 730.0-730.9     |



| <b>Table 6: Codes for Multi-Trauma and Complications of Previous Fracture</b> |                  |                                   |                                  |                                   |
|-------------------------------------------------------------------------------|------------------|-----------------------------------|----------------------------------|-----------------------------------|
|                                                                               |                  | MedPAR (DRG)                      | MedPAR (ICD-9 SX)                | Carrier/Outpt (CPTs)              |
| <b>Any Fracture (Hip, Humerus or Wrist)</b>                                   | Multiple Trauma  | 955, 957, 958, 959, 963, 964, 965 | NA                               | NA                                |
|                                                                               | Hardware removal | None                              | 78.6                             | 20680, 20670                      |
|                                                                               | Mal/Nonunion     | None                              | 78.5                             |                                   |
| <b>HIP</b>                                                                    | Multiple Trauma  | 956                               | None                             |                                   |
|                                                                               | Revision         | 466, 467, 468                     | 81.53, 00.7, 00.71, 00.72, 00.73 |                                   |
|                                                                               | Hardware removal | None                              |                                  | 27090, 27091                      |
|                                                                               | Mal/Nonunion     | None                              | None                             | 27470, 27472                      |
| <b>WRIST</b>                                                                  | Multiple Trauma  | None                              | None                             |                                   |
|                                                                               | Revision         | None                              | None                             |                                   |
|                                                                               | Hardware removal | None                              | None                             | 25248, 25250, 25251               |
|                                                                               | Mal/Nonunion     | None                              | None                             | 25350, 25400, 25405, 25415, 25420 |
| <b>HUMERUS</b>                                                                | Multiple Trauma  | No additional                     | None                             |                                   |
|                                                                               | Revision         | None                              | None                             |                                   |
|                                                                               | Hardware removal | None                              | None                             | 23040, 23107, 23330, 23331, 23332 |
|                                                                               | Mal/Nonunion     | None                              | None                             | 24400, 24430, 24435               |

| <b>Table 7: Codes for Outpatient Treatment of Complications</b> |                                                        |
|-----------------------------------------------------------------|--------------------------------------------------------|
| <b>Any Fracture (Hip, Humerus or Wrist)</b>                     | 20680, 20670                                           |
| <b>WRIST</b>                                                    | 25248, 25250, 25251, 25350, 25400, 25405, 25415, 25420 |
| <b>HUMERUS</b>                                                  | 23040, 23107, 23330, 23331, 23332, 24400, 24430, 24435 |

### ***Multiple Fracture on Index Date***

Some individuals had multiple index fractures on the same day (ex. a hip and wrist fracture from the same fall). In these cases, we attributed the person to the fracture category of greatest functional impact (hip>humerus>wrist).

### **Identifying Second Fracture**

#### ***Hip***

The occurrence of second hip, humerus, or wrist fracture was determined using the same approach to identifying the index fracture. Adaptations had to be made to distinguish follow up care for the index fracture versus a new secondary fracture because we cannot distinguish fractures that occur on the right or left side. When the secondary fracture was treated in the hospital with surgery, the indications for treatment are specific enough that there is high confidence that the fracture is new once we apply the exclusion criteria above. When the secondary fracture is at an entirely different site (for example, a wrist fracture after hip), there is also high confidence it represents a new subsequent fracture especially because we exclude any secondary fractures if that same type of fracture occurred within the prior year.

#### ***Wrist or Humerus***

For wrist and humerus fractures that most often are treated without surgery, it is challenging to distinguish a secondary fracture from follow-up care for the index fracture when the sequence is wrist followed by wrist or humerus followed by humerus because treatment is similar (ex. casting and re-casting appear the same in the claims). To address this issue, we additionally required a clean period with no claims for the fracture. We tested the sensitivity of our results to different length clean periods and present those results. Based on the sensitivity analysis and clinical judgment, we decided to apply a 90 day clean period in the final analysis.

#### ***Other Upper or Lower Extremity Fracture***

We were also interested in a more broad assessment of burden of secondary fracture incorporating other types of fracture that may be associated with osteoporosis. To do so, we also looked for the occurrence of other types of upper extremity or lower extremity fracture. For upper and lower extremity fracture, we applied a similar approach requiring no similar

fracture for year to exclude follow up care and selecting claims with an appropriate diagnosis and treatment indicator (Table 8).

| <b>Table 8 – Codes for Identifying Other Upper Extermity, Lower Extermity and Vertebral Fractures</b> |                                                                                                                                                                                                                       |                                         |                                                                                    |
|-------------------------------------------------------------------------------------------------------|-----------------------------------------------------------------------------------------------------------------------------------------------------------------------------------------------------------------------|-----------------------------------------|------------------------------------------------------------------------------------|
|                                                                                                       | <b>CPT (2010)</b>                                                                                                                                                                                                     | <b>ICD-9 (2010 &amp; 2006)</b>          | <b>Imaging Codes (cpt)</b>                                                         |
| <b>UPPER EXTREMITY</b>                                                                                |                                                                                                                                                                                                                       |                                         |                                                                                    |
| Clavicle                                                                                              | 23500, 23505, 23515                                                                                                                                                                                                   | 810.xx                                  |                                                                                    |
| Scapula                                                                                               | 23570, 23575, 23585                                                                                                                                                                                                   | 811.xx                                  |                                                                                    |
| Distal humerus                                                                                        | 24530, 24535, 24538, 24545, 24546, 24560, 24565, 24566, 24575, 24576, 24577, 24579, 24582, 24586, 24587                                                                                                               | 812.4x,<br>812.5x                       |                                                                                    |
| Proximal Forearm                                                                                      | 24620, 24635, 24650, 24655, 24665, 24666, 24670, 24675, 24685                                                                                                                                                         | 813.0x,<br>813.1x                       |                                                                                    |
| Forearm shaft                                                                                         | 25500, 25505, 25515, 25520, 25525, 25526, 25530, 25535, 25545, 25560, 25565, 25574, 25575                                                                                                                             | 813.2x,<br>813.3x                       |                                                                                    |
| Unspecified forearm fx                                                                                | Use dx CPTs in prox forearm and forearm shaft sections                                                                                                                                                                | 813.8x,<br>813.9x,<br>818.xx,<br>819.xx |                                                                                    |
| <b>LOWER EXTREMITY</b>                                                                                |                                                                                                                                                                                                                       |                                         |                                                                                    |
| Pelvic                                                                                                | 27193, 27194, 27200, 27202, 27215, 27216, 27217, 27218, 27220, 27222, 27226, 27227, 27228                                                                                                                             | 808.x                                   | 72170, 72190, 72192, 72193, 72194, 72195, 72196, 72197, 73500, 73510, 73520, 73540 |
| Femoral shaft                                                                                         | 27500, 27501, 27502, 27503 27506, 27507, 27508, 27509, 27510, 27511, 2751327514                                                                                                                                       | 821.x other than 821.00-821.11          | 73550                                                                              |
| Proximal Tibia                                                                                        | 27530, 27532, 27535, 27536, 29855, 29856, 27538, 29850, 29851 27540                                                                                                                                                   | 823.0x,<br>823.1x                       | 73560, 73562, 73564                                                                |
| Tibial Shaft                                                                                          | 27750, 27752, 27756, 27758, 27759                                                                                                                                                                                     | 823.2x,<br>823.3x<br>(823.8x,<br>823.9  | 73590, 73592                                                                       |
| Ankle (distal tibia/ankle)                                                                            | 27760, 27762, 27766, (27767, 27768, 27769-(added between 2005 and 2010), 27780, 27781, 27784, 27786, 27788, 27792, 27808, 27810, 27814, 27816, 27818, 27822, 27823, 27824, 27825, 27826, 27827, 27828, 27829          | 824.xx                                  | 73600, 73610                                                                       |
| Foot                                                                                                  | 28400, 28405, 28406, 28415, 28420, 28430, 28435, 28436, 28445, 28446 (added between 2005-2010), 28450, 28455, 28456, 28465, 28470, 28475, 28476, 28485, 28490, 28495, 28496, 28505, 28510, 28515, 28525, 28530, 28531 | 825.x, 826.x                            | 73620, 73630                                                                       |
| Lower Extermity-MRIs for all fx                                                                       |                                                                                                                                                                                                                       |                                         | 73700-73725                                                                        |
